# Supplementary material for: Early Immune Initiation by Porcine Cells following Toxoplasma gondii Infection versus TLR Ligation
Source: MDPI journal article supplement (doi:10.3390/microorganisms9091828), 2021-08-28
Supplement: s1 [file s1]

| Target         | Clone                  | Reactive Species                   | Host Species      | Isotype | Conjugate            | Manufacturer     | Product Code  |
|----------------|------------------------|------------------------------------|-------------------|---------|----------------------|------------------|---------------|
| CD3e           | PPT3                   | Pig                                | Mouse             | IgG1    | -                    | Bio-Rad          | MCA5951GA     |
| gdTCR1         | PGBL22A                | Pig                                | Mouse             | IgG1    | -                    | KingFisher       | WS0621S-100   |
| CD335/NKp46    | VIV-KM1                | Pig                                | Mouse             | IgG1    | -                    | Bio-Rad          | MCA5972GA     |
| CD21           | BB6-11C9.6             | Pig                                | Mouse             | IgG1    | -                    | Biozol           | SBA-4530-01   |
| IgM            | F008-1629              | Pig                                | Mouse             | IgG1    | -                    | BD Biosciences   | 552551        |
| IgG1           | X-56                   | Mouse                              | Rat               | IgG1    | MACS MicroBeads      | Miltenyi Biotech | 130-047-101   |
| CD14           | TÜK4                   | Human (Cross-reactive to pig [19]) | Mouse             | IgG2a   | MACS MicroBeads      | Miltenyi Biotech | 130-050-201   |
| IgG1           | RMG1-1                 | Mouse                              | Rat               | IgG     | APC-Cy7              | Biolegend        | 406620        |
| CD14           | MIL2                   | Pig                                | Mouse             | IgG2b   | -                    | Bio-Rad          | MCA1218GA     |
| IgG2b          | Polyclonal             | Mouse                              | Goat              | -       | APC-Cy7              | Southern Biotech | SBA-1090-19   |
| CADM1          | 3E1                    | Human (Cross-reactive to pig [19]) | Chicken           | IgY     | Alexa 647            | Biozol           | MBL-CM004-A64 |
| CD4a           | 74-12-4                | Pig                                | Mouse             | IgG2b   | PerCP-Cy5.5          | BD Biosciences   | 561474        |
| CD172a         | 74-22-15A              | Pig                                | Mouse             | IgG2b   | PE                   | BD Biosciences   | 561498        |
| CD80/86        | CD152 (fusion protein) | Human (Cross-reactive to pig [19]) | Mouse (Fc region) | IgG2a   | -                    | Ancell           | ANC-501-820   |
| IgG2a          | R19-15                 | Mouse                              | Rat               | IgG1    | Brilliant Violet 605 | BD Biosciences   | 564024        |
| IL-12/IL-23p40 | 116211                 | Pig                                | Mouse             | IgG2b   | Biotin               | R&D Systems      | BAM9122       |
| TNF-a          | MAb11                  | Human (Cross-reactive to pig [19]) | Mouse             | IgG1    | Pacific Blue         | Biolegend        | 502920        |
| Streptavidin   | -                      | -                                  | -                 | -       | PE-Cy7               | ThermoFisher     | 25-4317-82    |
| CD172a         | BL1H7                  | Pig                                | Mouse             | IgG1    | -                    | Bio-Rad          | MCA2312GA     |
| CD8a           | 76-2-11                | Pig                                | Mouse             | IgG2a   | -                    | ThermoFisher     | MA528717      |
| CD3            | BB23-8E6-8C8           | Pig                                | Mouse             | IgG2a   | PerCP-Cy5.5          | BD Biosciences   | 561478        |
| CD4            | 74-12-4                | Pig                                | Mouse             | IgG2b   | PE-Cy7               | BD Biosciences   | 561473        |
| CD16           | G7                     | Pig                                | Mouse             | IgG1    | FITC                 | Bio-Rad          | MCA1971F      |
| CD335/NKp46    | VIV-KM1                | Pig                                | Mouse             | IgG1    | APC                  | Bio-Rad          | MCA5972APC    |
| IFNg           | P2G10                  | Pig                                | Mouse             | IgG1    | PE                   | BD Biosciences   | 559812        |
